# Supplementary material
Source: HighWire-hosted journal article supplement (https://tsaco.bmj.com/content/5/1/e000512)
Supplement: inline-supplementary-material-1 [file inline-supplementary-material-1.pdf]

## APPENDIX A

### The National Trauma Research Action Plan (NTRAP) Investigators Group:

Eileen M. Bulger, M.D., Michelle A. Price, Ph.D., Pamela J. Bixby, Jeffrey A. Bailey, M.D., Karen J. Brasel, M.D., Maxwell Braverman, M.D., Zara R. Cooper, M.D., Todd W. Costantini, M.D., James R. Ficke, M.D., Nicole S. Gibran, M.D., Jonathan I. Groner, M.D., Adil H. Haider, M.D., M.P.H., Bellal A. Joseph, M.D., Craig D. Newgard, M.D., Edward S. Shipper, M.D., and Deborah M. Stein, M.D., M.P.H.

## APPENDIX B: Search strategy

("Wounds and Injuries"[Mesh] OR "injuries"[Subheading] OR trauma\*[tiab] OR injury[tiab] OR injuries[tiab] OR polytrauma\*[tiab]) AND ("Recovery of Function"[Mesh] OR recovery of function[tiab] OR functional outcome\*[tiab] OR return to work[tiab] OR "Activities of Daily Living"[Mesh] OR activities of daily living[tiab] OR daily living activit\*[tiab] OR functional limit\*[tiab] OR "Chronic Pain"[mesh] OR chronic pain[tiab] OR "Stress Disorders, Post-Traumatic"[Mesh] OR stress disorder\*[tiab] OR stress syndrome\*[tiab] OR traumatic stress\*[tiab] OR posttraumatic stress\*[tiab] OR traumatic psycho\*[tiab] OR posttraumatic psycho\*[tiab] OR traumatic neurosis[tiab] OR ptsd[tiab] OR "Anxiety Disorders"[mesh] OR "Anxiety"[mesh] OR anxiety[tiab] OR "Substance-Related Disorders"[Mesh] OR substance abuse[tiab] OR drug use\*[tiab] OR drug abuse\*[tiab] OR alcohol\*[tiab] OR alcoholic\*[tiab] OR drinking[tiab] OR opioid\*[tiab] OR opiate\*[tiab] OR narcotic\*[tiab] OR heroin[tiab] OR morphine[tiab] OR opium[tiab] OR "Depressive Disorder"[Mesh] OR "Depression"[Mesh] OR depression[tiab] OR depressive[tiab] OR "Quality of Life"[mesh] OR quality of life[tiab] OR "Cognition"[mesh] OR cognition[tiab] OR cognitive[tiab] OR "Executive Function" OR executive function\*[tiab] OR executive control\*[tiab]) AND ("Patient Reported Outcome Measures"[Mesh] OR "Surveys and Questionnaires"[Mesh] OR patient report\*[tiab] OR questionnaire\*[tiab] OR survey\*[tiab] OR instrument\*[tiab] OR inventor\*[tiab])

Limited to studies published in English language, in adults  $\geq 18$  years, and after 01/10/2013.

### **APPENDIX C**

1. First author of the manuscript
2. Year of publication
3. Country of origin
4. Study type: quantitative, qualitative or mixed
5. Study design: observational, RCT, systematic review or meta-analysis
6. Number of patients included in the study
7. Times of follow-up after the injury
8. Injury type
9. Injury location by AIS region
10. Outcome category: physical, mental, social/general QoL, cognitive
11. Outcome measures
12. Instruments used
